# Supplementary material for: Three allele combinations associated with Multiple Sclerosis
Source: PubMed Central journal article supplement (PMC1557481; doi:10.1186/1471-2350-7-63), 2006-07-26
Supplement: 1471-2350-7-63-S1.pdf [file 1471-2350-7-63-S1.pdf]

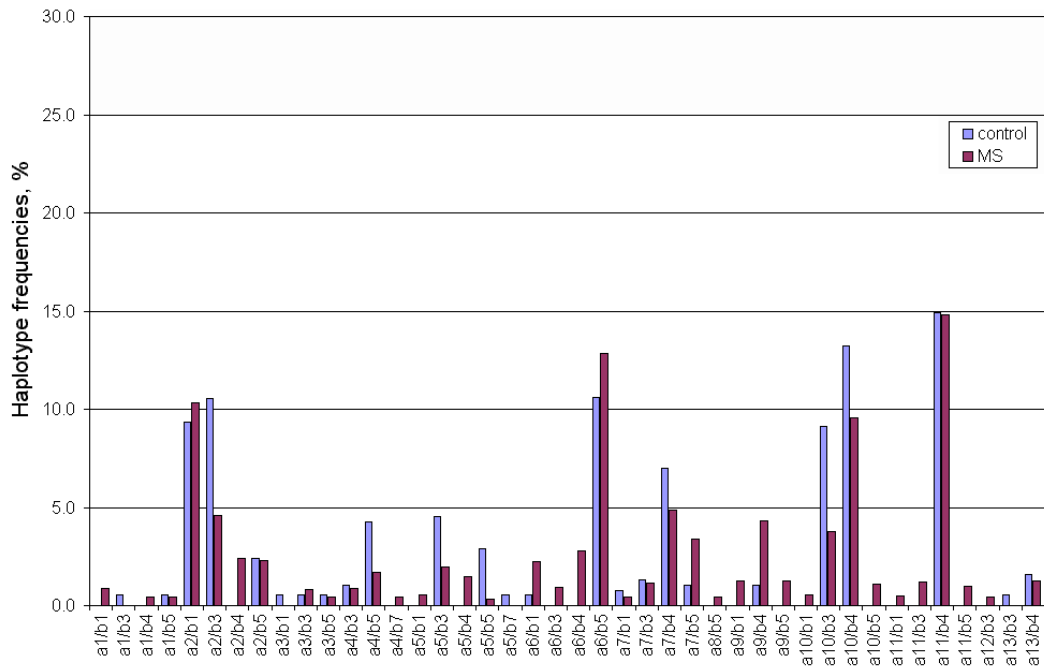

**Additional Figure 1** *TNFα/TNFβ* haplotype frequencies in MS patients and controls. Haplotypes are designated in accordance with *TNFα/TNFβ* allele names.
