# Supplementary material for: Three allele combinations associated with Multiple Sclerosis
Source: PubMed Central journal article supplement (PMC1557481; doi:10.1186/1471-2350-7-63), 2006-07-26
Supplement: 1471-2350-7-63-S2.pdf [file 1471-2350-7-63-S2.pdf]

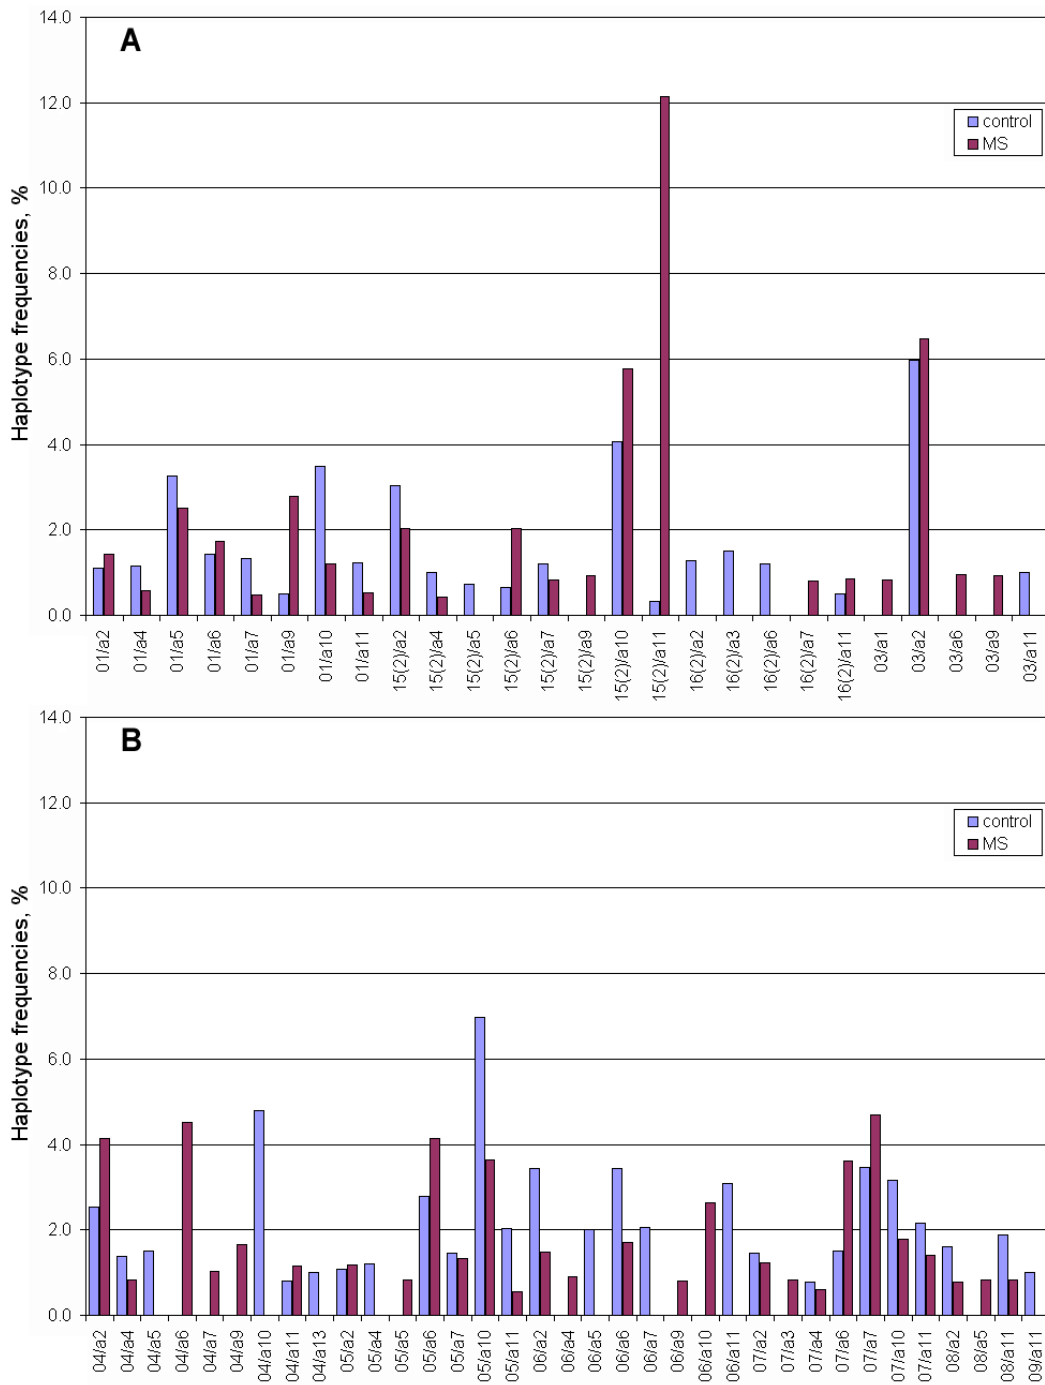

**Additional Figure 2** *DRB1/TNFA* haplotype frequencies in MS patients and controls: (A) for *DRB1\*01-DRB1\*03* alleles, (B) for *DRB1\*04-DRB1\*09* alleles. Haplotypes are designated in accordance with *DRB1/TNFA* allele names. Haplotypes with frequencies less than 0.5% both in MS patients and in controls are not shown.
