# Supplementary material for: Three allele combinations associated with Multiple Sclerosis
Source: PubMed Central journal article supplement (PMC1557481; doi:10.1186/1471-2350-7-63), 2006-07-26
Supplement: 1471-2350-7-63-S3.pdf [file 1471-2350-7-63-S3.pdf]

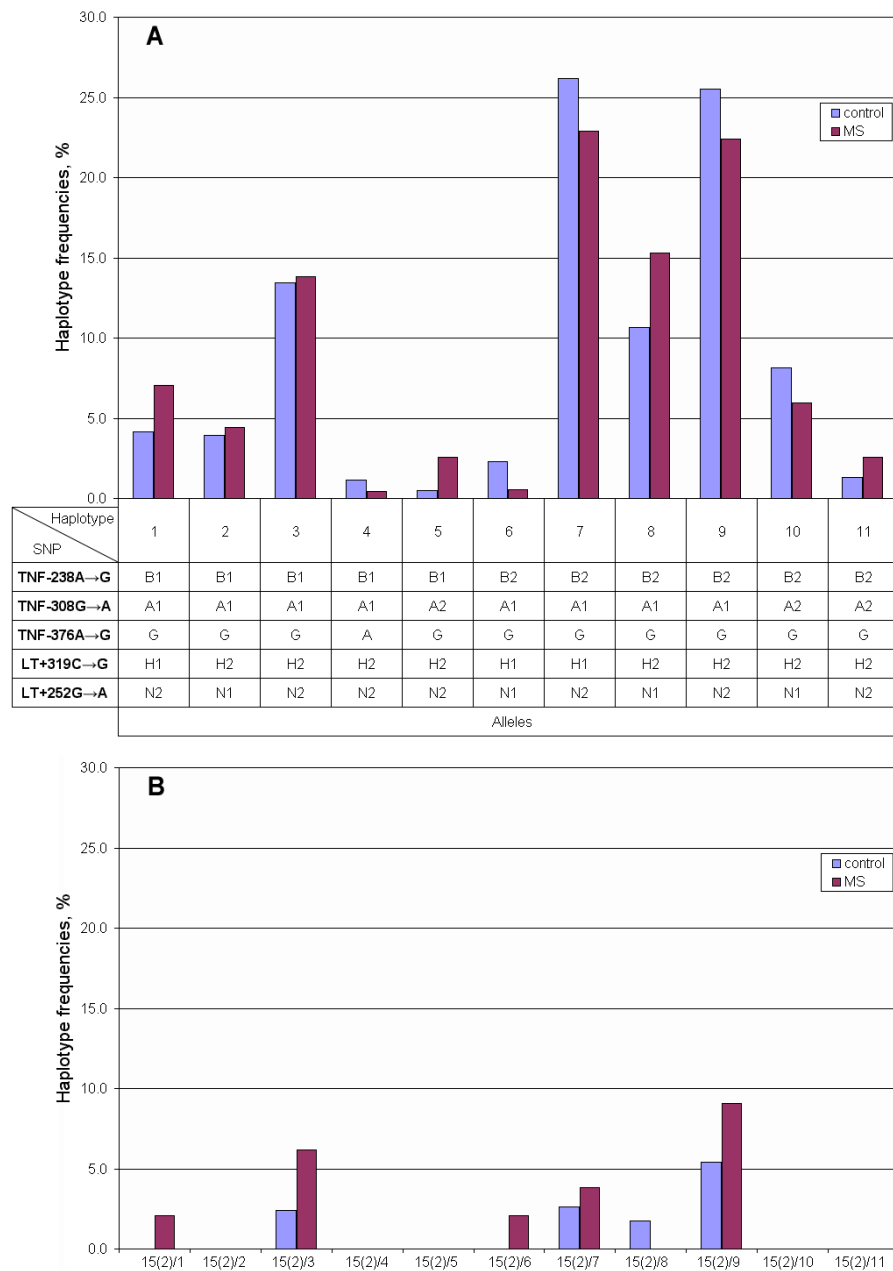

**Additional Figure 3** *TNF/LT* haplotypes in MS patients and controls. (A) *TNF/LT* haplotype frequencies in all MS patients and controls; haplotype designations and entering SNP alleles are shown below. (B) Frequencies of extended haplotypes including *DR15(2)* and different *TNF/LT* haplotypes in all MS patients and controls. Haplotypes are marked in accordance with *DRB1* allele name and *TNF/LT* haplotype designation given in (A). For better visualization, the same axis scales were used.
