# Supplementary material for: Three allele combinations associated with Multiple Sclerosis
Source: PubMed Central journal article supplement (PMC1557481; doi:10.1186/1471-2350-7-63), 2006-07-26
Supplement: 1471-2350-7-63-S4.pdf [file 1471-2350-7-63-S4.pdf]

**Additional Table 1 – Phenotypic frequencies (%) of SNP alleles in Russian MS patients and healthy individuals**

| SNPs<br>(Allele 1/Allele 2) | MS patients |          | Controls |          |
|-----------------------------|-------------|----------|----------|----------|
|                             | Allele 1    | Allele 2 | Allele 1 | Allele 2 |
| -308 <i>TNF</i> (A2/A1)     | 20.3        | 100      | 21.7     | 100      |
| -238 <i>TNF</i> (B1/B2)     | 44.2        | 90.3     | 39.3     | 92.0     |
| -376 <i>TNF</i> (A/G)       | 3.0         | 100      | 3.4      | 100      |
| +252 <i>LT</i> (N1/N2)      | 46.1        | 95.6     | 42.0     | 92.0     |
| +319 <i>LT</i> (H1/H2)      | 57.2        | 92.0     | 59.2     | 91.2     |
| -509 <i>TGFβ1</i> (C/T)     | 86.6        | 55.5     | 84.4     | 62.0     |
| +72 <i>TGFβ1</i> (wt/ins)   | 97.0        | 16.2     | 98.5     | 12.4     |
| +869 <i>TGFβ1</i> (T/C)     | 84.0        | 60.0     | 82.7     | 64.9     |
| +915 <i>TGFβ1</i> (G/C)     | 97.5        | 14.0     | 97.6     | 13.3     |
| +1632 <i>TGFβ1</i> (C/T)    | 100         | 5.2      | 100      | 7.3      |
| <i>CCR5</i> (wt/Δ32)        | 98.2        | 24.2     | 99.4     | 19.2     |
| +49 <i>CTLA4</i> (A/G)      | 81.0        | 69.6     | 82.3     | 67.5     |

The numbers of typed individuals are given in Table 1.
